# Supplementary material for: The Effect of Enrichment on Leopard Geckos (Eublepharis macularius) Housed in Two Different Maintenance Systems (Rack System vs. Terrarium)
Source: MDPI journal article supplement (doi:10.3390/ani13061111), 2023-03-21
Supplement: s1 [file s1]

**Table S1.** Behavior types observed during the study

| Type of enrichment | Behavior type         | Definition                                                                                                             |
|--------------------|-----------------------|------------------------------------------------------------------------------------------------------------------------|
| Wet hide           | watch                 | Observation with the eyesight directed towards the enrichment with the stationary position of the body                 |
|                    | lick                  | Ejecting and retracting the tongue for contact with the environment and enrichment                                     |
|                    | sniff                 | Direct nasal contact with the enrichment for exposure to the scent                                                     |
|                    | circle the enrichment | Moving around the enrichment with the body very close to the object; occasional contact by touching it with the tongue |
|                    | climb                 | Climbing onto the enrichment; descending from the enrichment                                                           |
|                    | rest on the lid       | Rest with the whole body on the enrichment with the body in the motionless position                                    |
|                    | rest inside           | Rest with the whole body inside the enrichment; lying on the substrate                                                 |
| Dry hide           | dig in the substrate  | Digging in the substrate while in the middle of the enrichment; occasional contact by touching it with the tongue      |
|                    | watch                 | Observation with the eyesight directed towards the enrichment with the stationary position of the body                 |
|                    | lick                  | Ejecting and retracting the tongue for contact with the environment and enrichment                                     |
|                    | sniff                 | Direct nasal contact with the enrichment for exposure to the scent                                                     |
|                    | circle the enrichment | Moving around the enrichment with the body very close to the object; occasional contact by touching it with the tongue |
|                    | climb                 | Climbing onto the enrichment; descending from the enrichment                                                           |
|                    | rest on the hide      | Rest with the whole body on the enrichment with the body in the motionless position                                    |
| Feeding            | rest under the hide   | Rest with the whole body underneath the enrichment with the body in the motionless position                            |
|                    | scratch               | Intentional use of claws for scratching the enrichment (claw abrasion); rubbing the body against the enrichment        |
|                    | watch                 | Observation with the eyesight directed towards the enrichment with the stationary position of the body                 |
|                    | lick                  | Ejecting and retracting the tongue for contact with the environment and enrichment                                     |
|                    | sniff                 | Direct nasal contact with the enrichment for exposure to the scent                                                     |
|                    | climb                 | Climbing onto the enrichment; descending from enrichment; passing by the enrichment                                    |
|                    | hunt                  | Attempt to hunt insects inside the enrichment; species-specific tail movements                                         |
| New object         | manipulate            | Manipulating (holding) an object with one or more feet                                                                 |
|                    | watch                 | Observation with the eyesight directed towards enrichment with the stationary position of the body                     |
|                    | lick                  | Ejecting and retracting the tongue for contact with the environment and enrichment                                     |
|                    | sniff                 | Direct nasal contact with the enrichment for exposure to the scent                                                     |
|                    | climb                 | Climbing onto the enrichment; descending from the enrichment; passing by the enrichment                                |
|                    | manipulate            | Manipulating (holding) an object with one or more feet                                                                 |
